# Supplementary material for: The impact of diabetes on the relationship of coronary artery disease and outcome: a study using multimodality imaging
Source: Springer Nature journal article supplement (doi:10.1186/s12933-023-01850-3), 2023-05-31

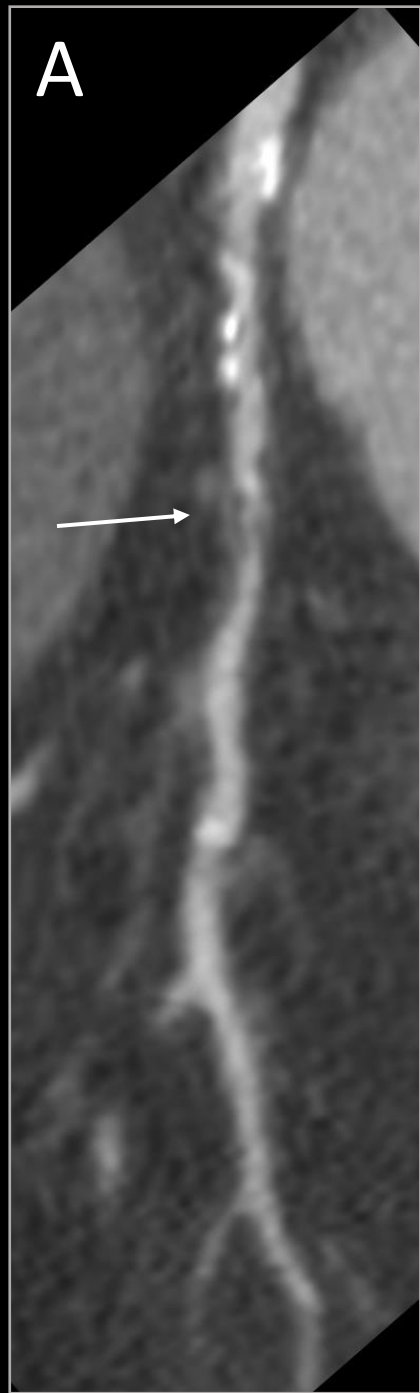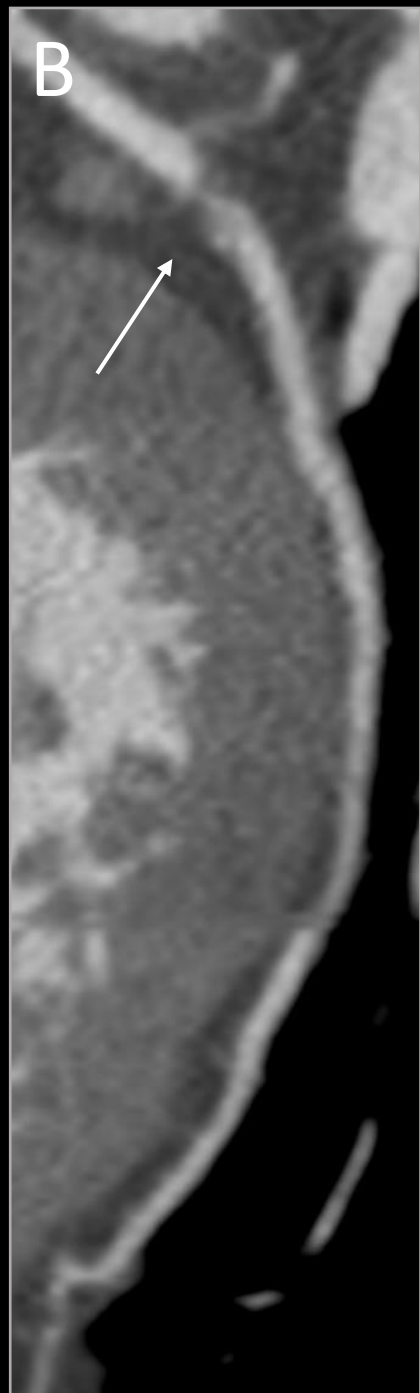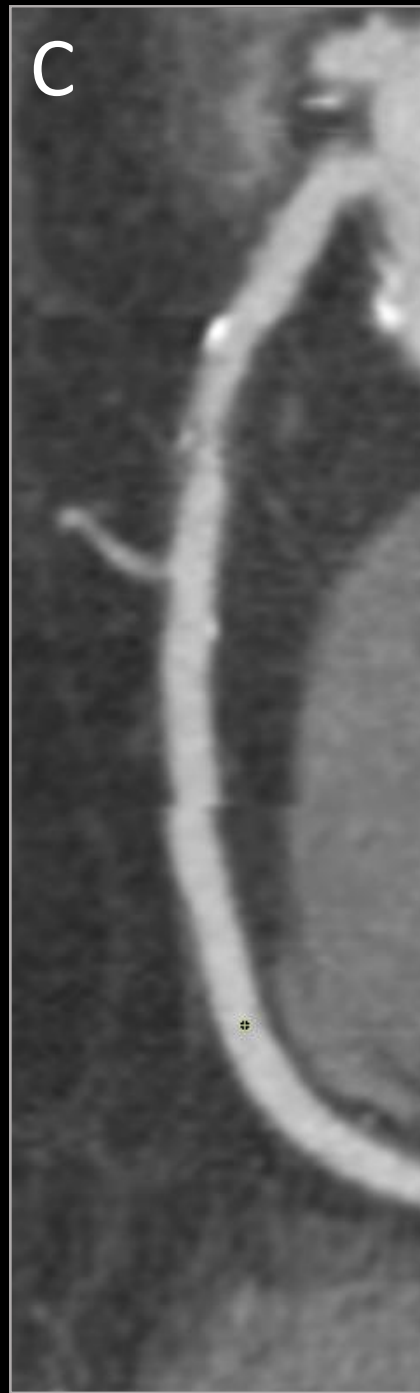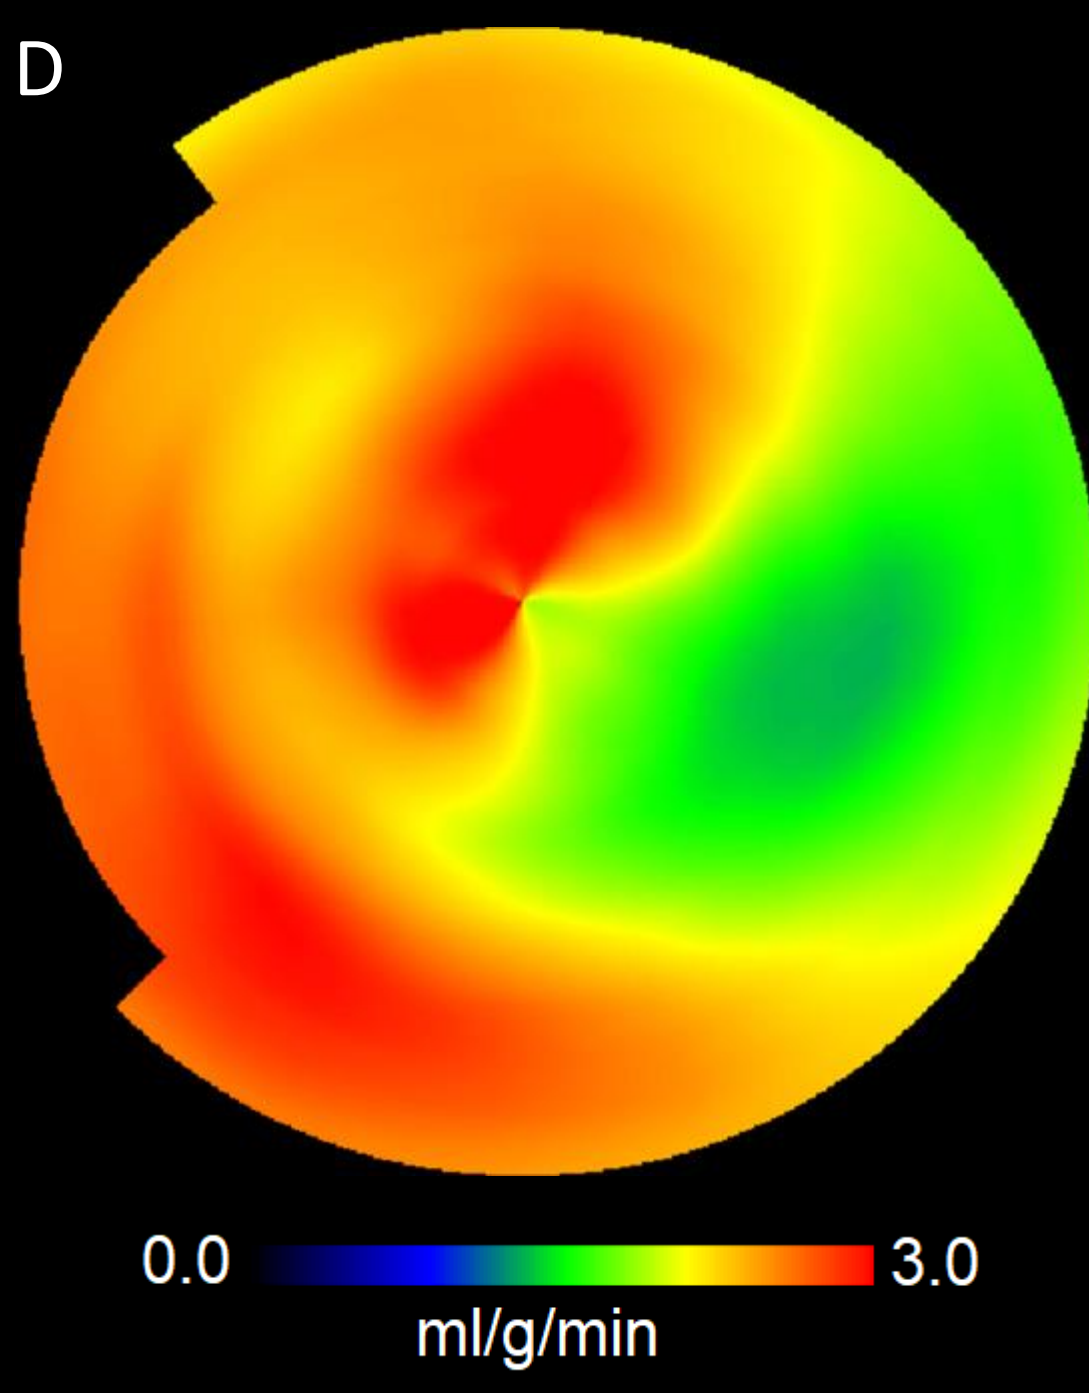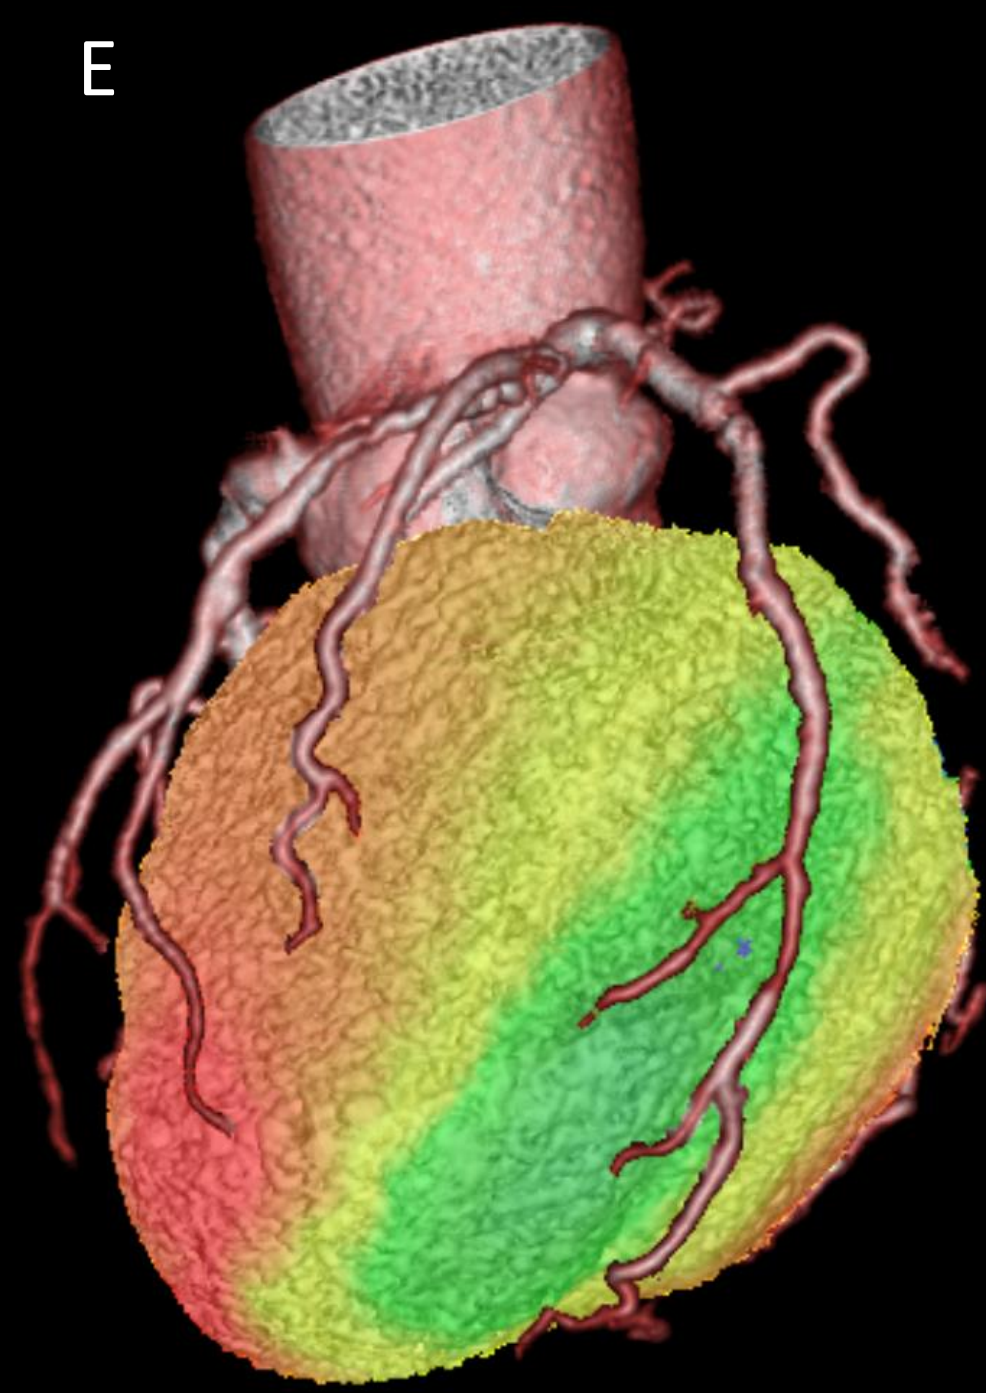

Supplement: MOESM2 [file 25429332]
